# Supplementary material for: Genetic association of lipid-lowering drug target genes with erectile dysfunction and male reproductive health
Source: Frontiers journal article supplement (doi:10.3389/fendo.2024.1362499), 2024-02-08

**Supplementary figure 1.** Leave-one-out analysis of genetically proxied inhibitors / agonists on ED(FinnGen).

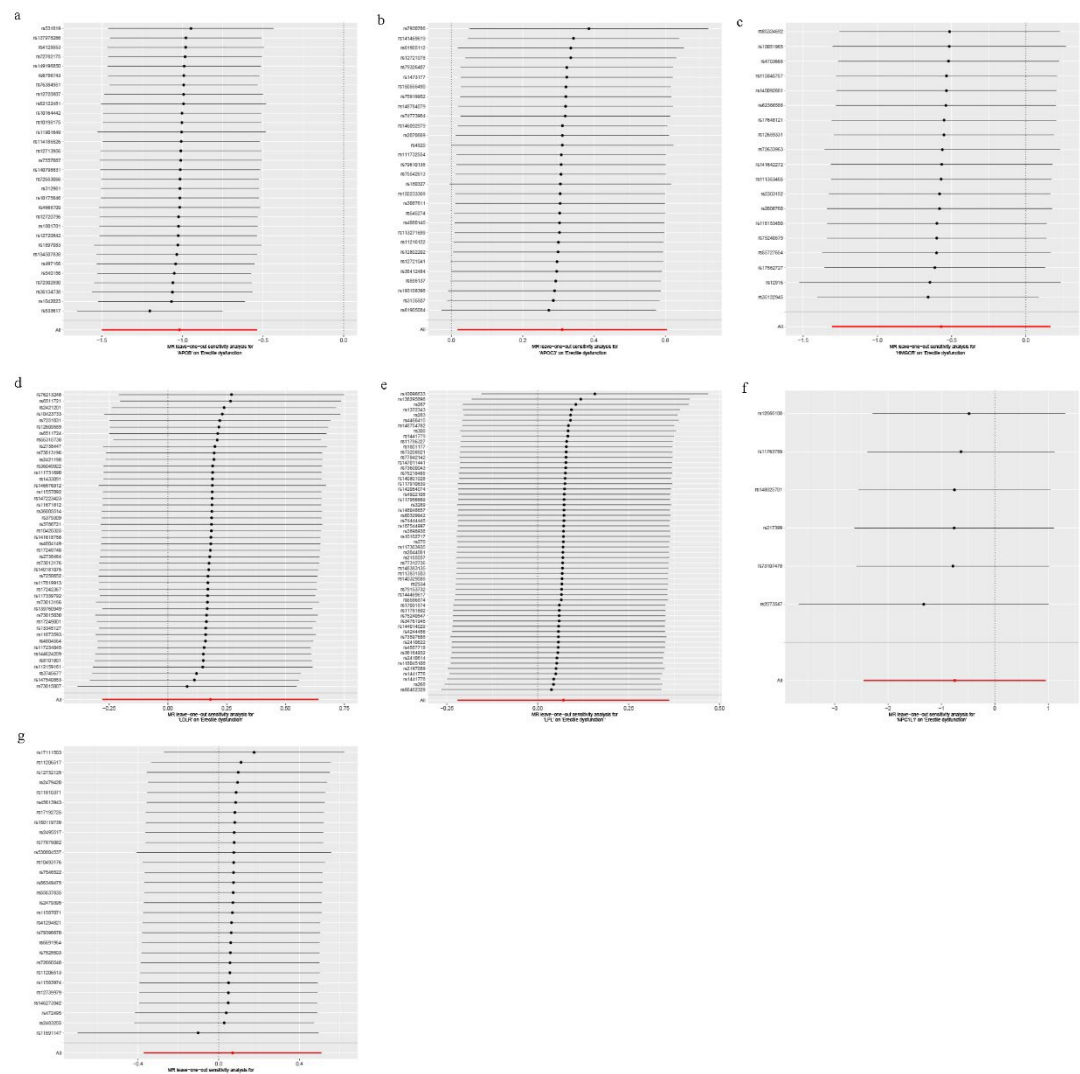

**Supplementary figure 2.** Leave-one-out analysis of genetically proxied inhibitors / agonists on ED(ebi).

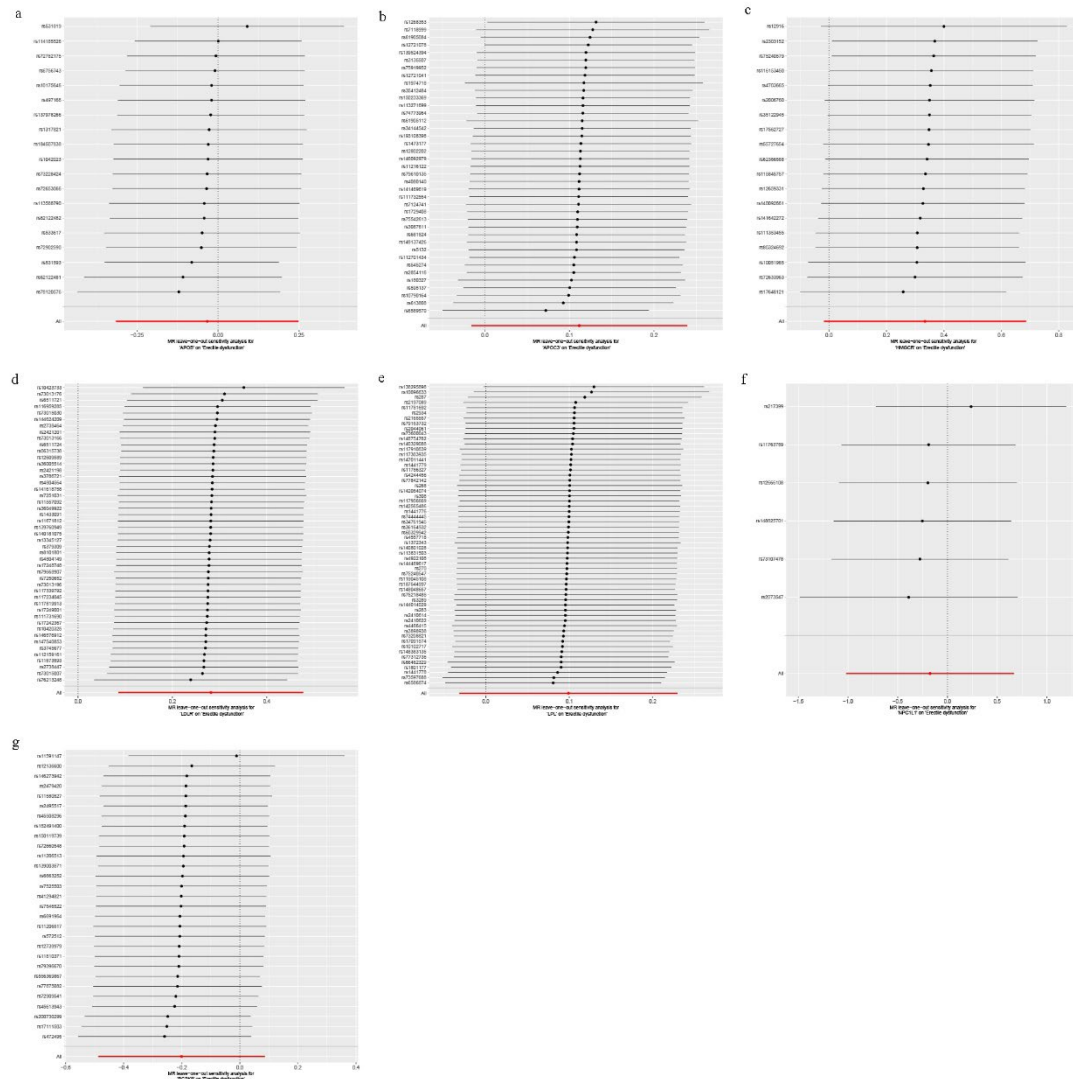

**Supplementary figure 3.** Leave-one-out analysis of genetically proxied inhibitors / agonists on TT.

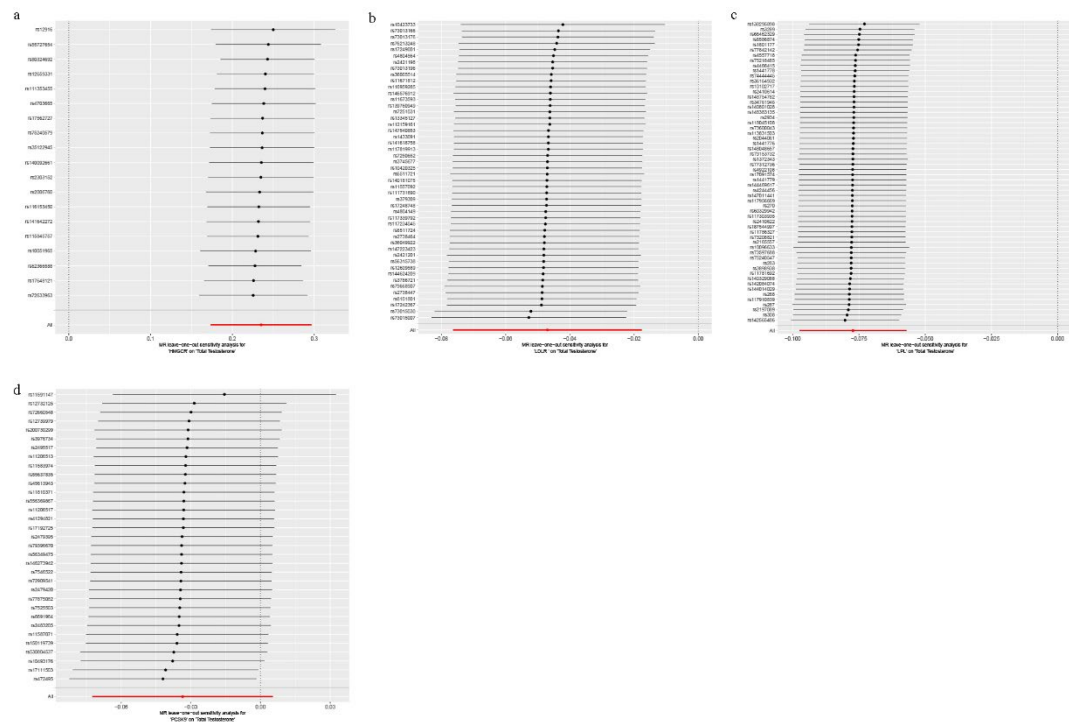

**Supplementary figure 4.** Leave-one-out analysis of genetically proxied inhibitors / agonists on BT.

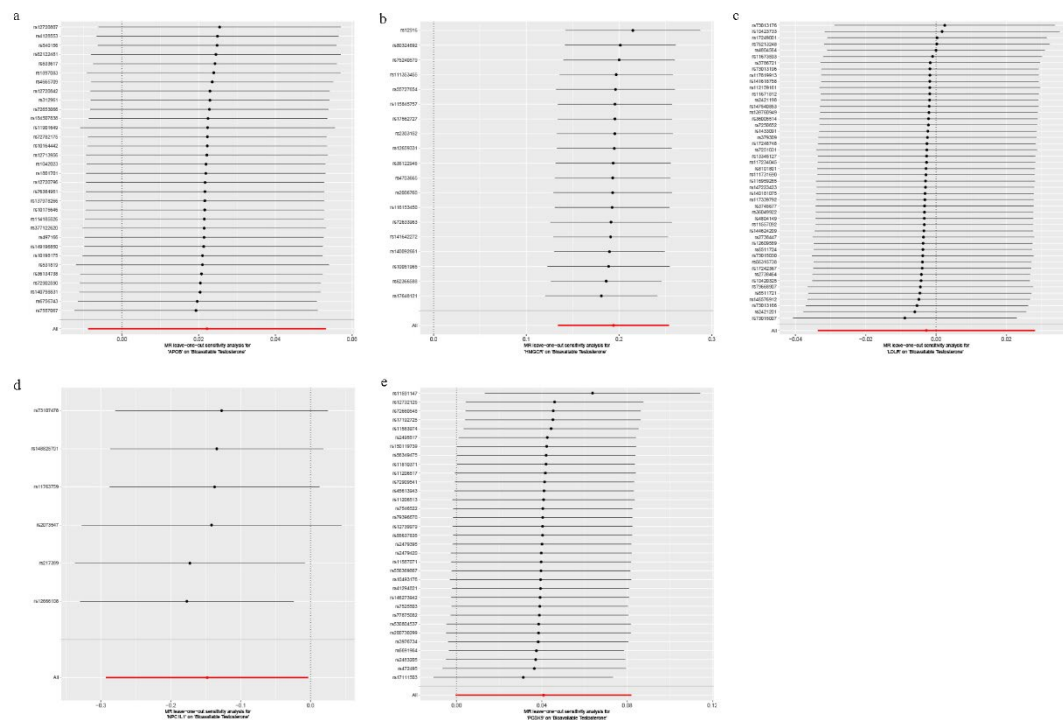

**Supplementary figure 5.** Leave-one-out analysis of genetically proxied inhibitors / agonists on E2.

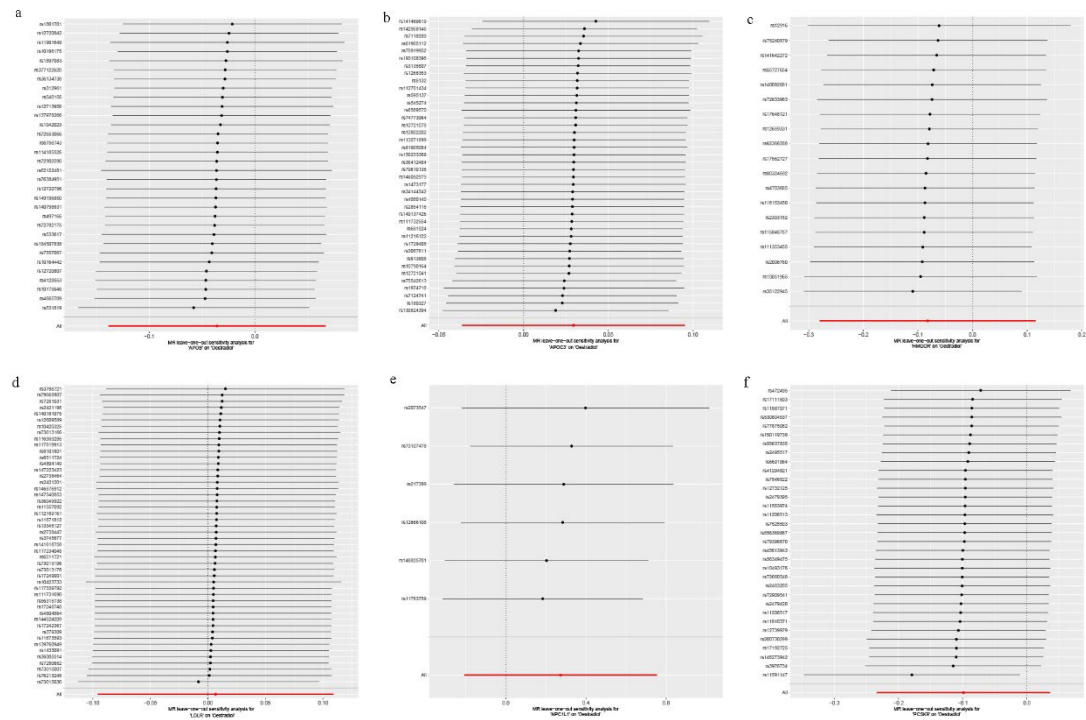

**Supplementary figure 6.** Leave-one-out analysis of genetically proxied inhibitors / agonists on SHBG.

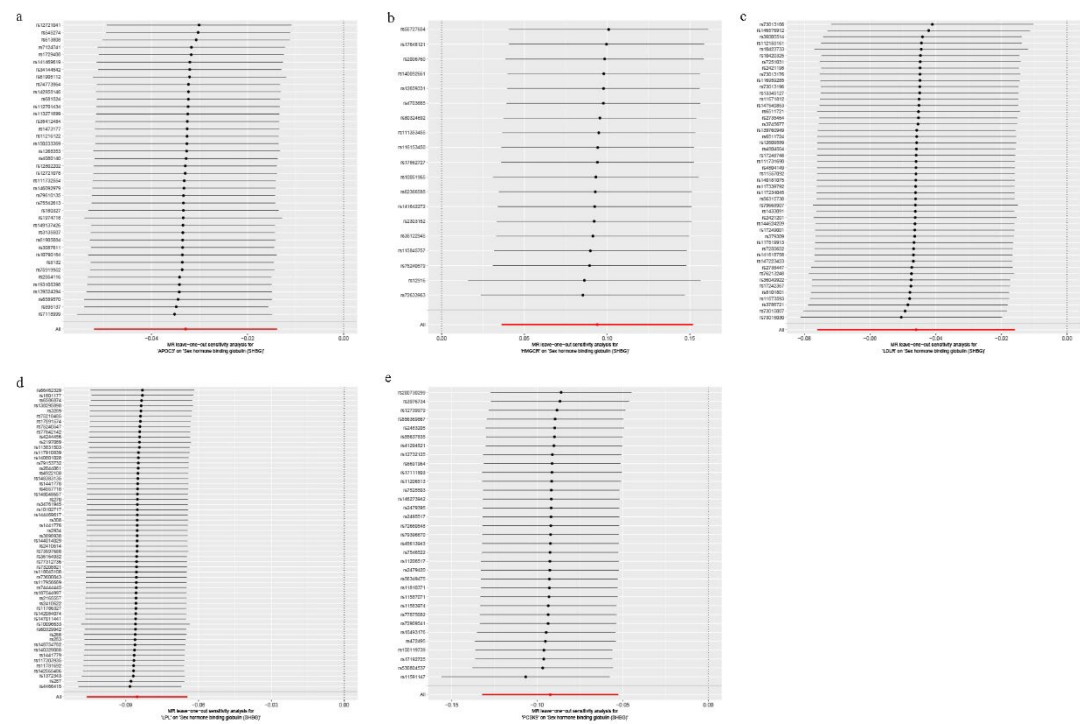

**Supplementary figure 7.** Leave-one-out analysis of genetically proxied inhibitors / agonists on PH.

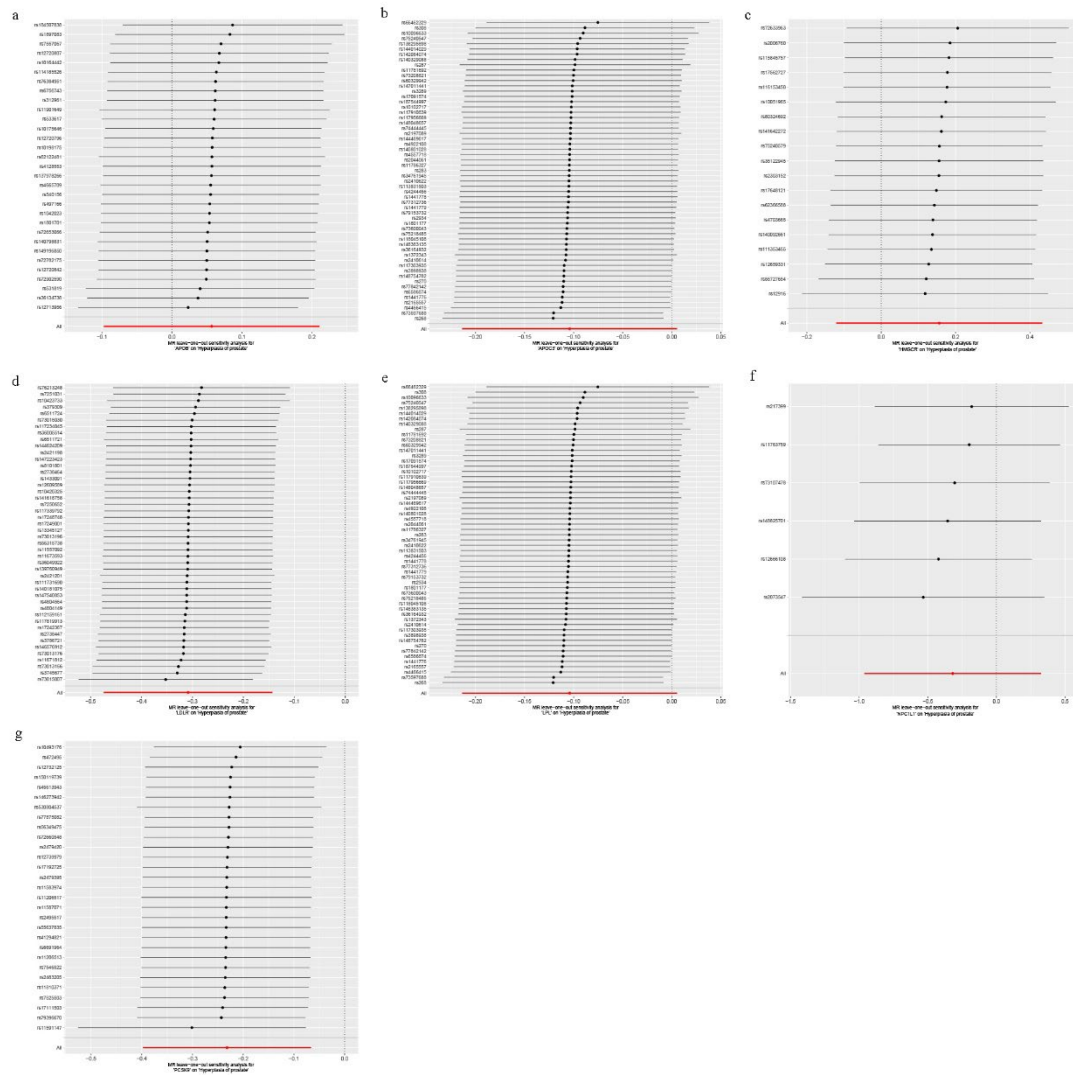

**Supplementary figure 8.** Leave-one-out analysis of genetically proxied inhibitors / agonists on PI.

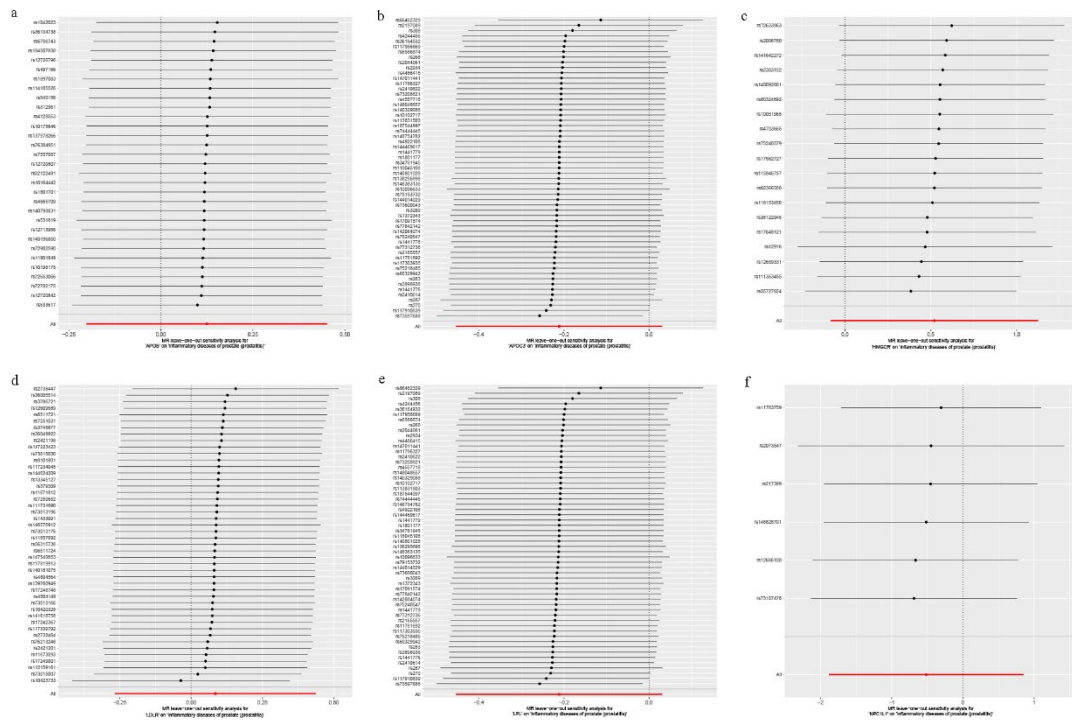



**Supplementary figure 9.** Leave-one-out analysis of genetically proxied inhibitors / agonists on PCa.

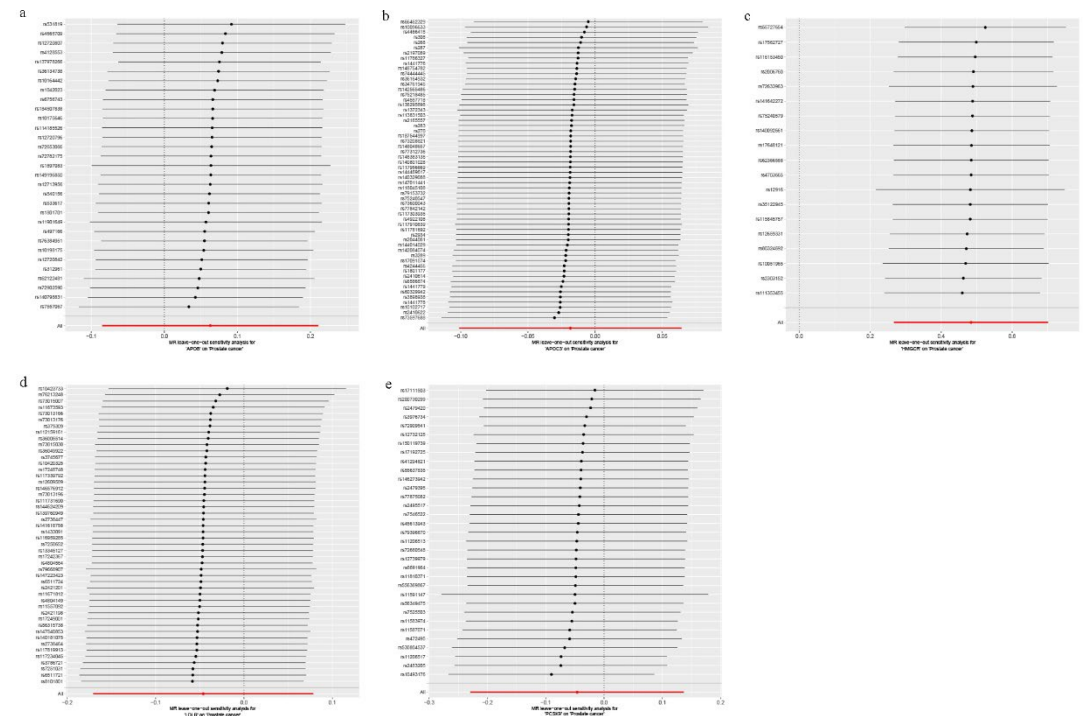

Supplementary figure 10. Leave-one-out analysis of genetically proxied inhibitors / agonists on AS.

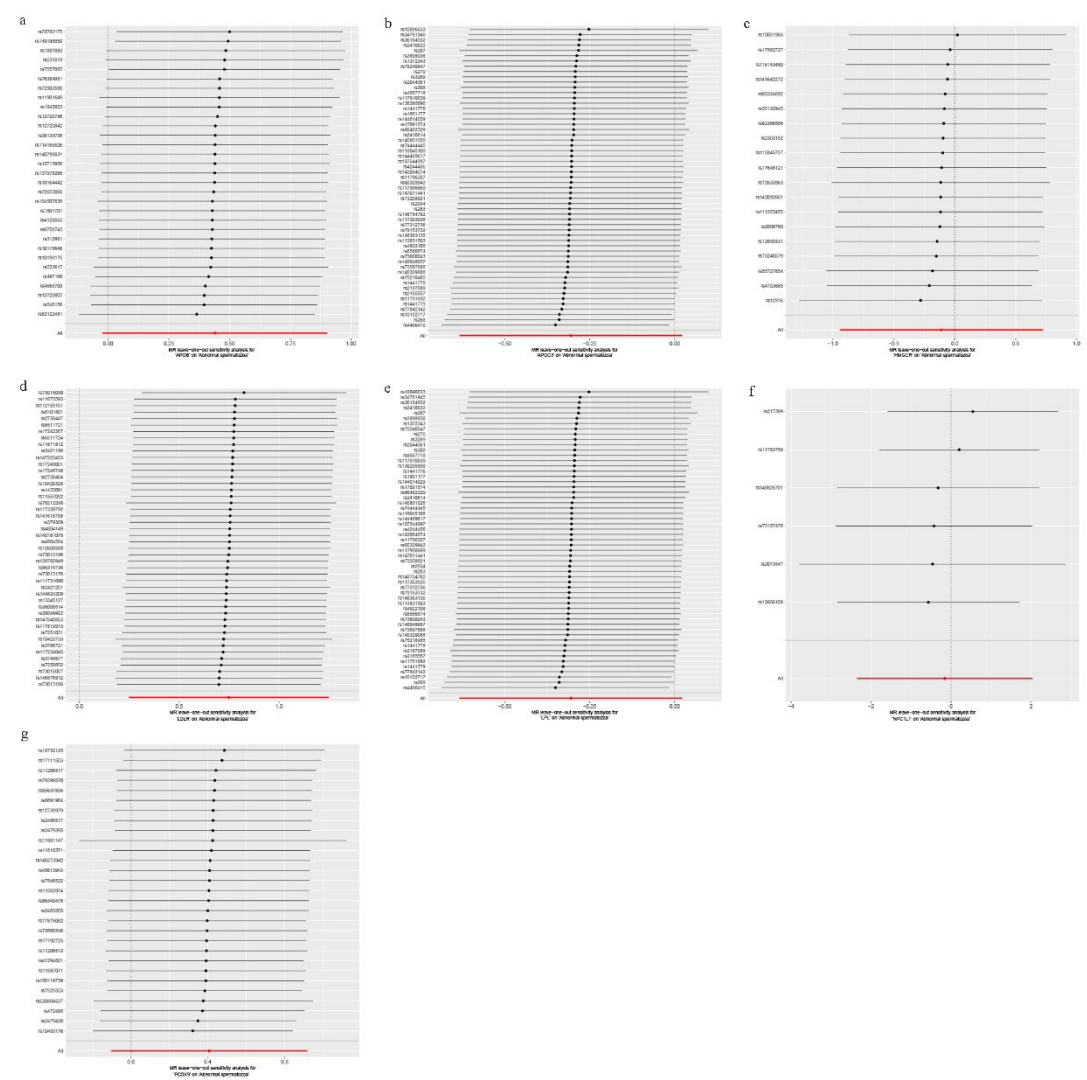

**Supplementary figure 11.** Leave-one-out analysis of genetically proxied inhibitors / agonists on MI.

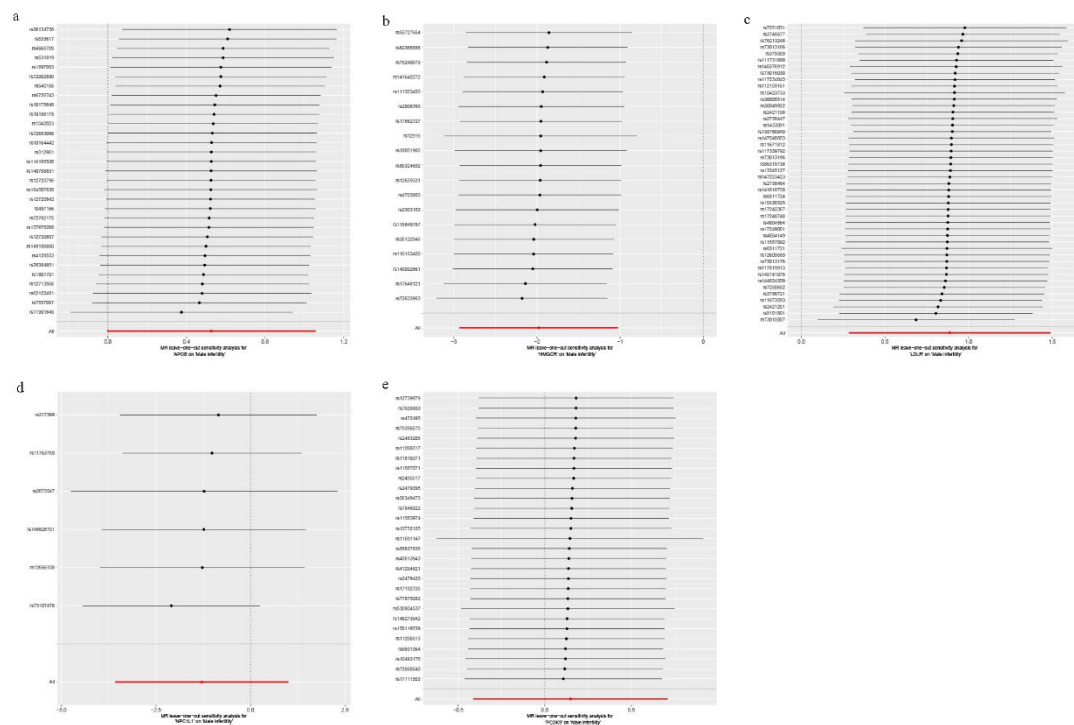

**Supplementary figure 12.** MR analysis of association between drug targets and sex hormones (TT and BT).

| Outcome | Target | method                    | nsnp | pval   |  | OR (95% CI)              |
|---------|--------|---------------------------|------|--------|--|--------------------------|
| TT      | LDLR   | Inverse variance weighted | 48   | 0.0017 |  | 1.0481 (1.0187 - 1.0775) |
|         |        | Weighted median           | 48   | 0.0025 |  | 1.0669 (1.0250 - 1.1089) |
|         |        | Weighted mode             | 48   | 0.0222 |  | 1.0633 (1.0124 - 1.1142) |
|         | HMGCR  | Inverse variance weighted | 19   | <0.001 |  | 0.7904 (0.7288 - 0.8521) |
|         |        | Weighted median           | 19   | <0.001 |  | 0.8104 (0.7318 - 0.8891) |
|         |        | Weighted mode             | 19   | <0.001 |  | 0.7968 (0.7214 - 0.8722) |
|         | PCSK9  | Inverse variance weighted | 33   | 0.0912 |  | 1.0341 (0.9952 - 1.0730) |
|         |        | Weighted median           | 33   | 0.0229 |  | 1.0688 (1.0115 - 1.1262) |
|         |        | Weighted mode             | 33   | 0.0872 |  | 1.0589 (0.9953 - 1.1225) |
|         | LPL    | Inverse variance weighted | 58   | <0.001 |  | 1.0803 (1.0601 - 1.1006) |
|         |        | Weighted median           | 58   | <0.001 |  | 1.0762 (1.0457 - 1.1067) |
|         |        | Weighted mode             | 58   | <0.001 |  | 1.0754 (1.0445 - 1.1063) |
| BT      | LDLR   | Inverse variance weighted | 48   | 0.8606 |  | 1.0028 (0.9719 - 1.0337) |
|         |        | Weighted median           | 48   | 0.4895 |  | 0.9844 (0.9397 - 1.0291) |
|         |        | Weighted mode             | 48   | 0.7138 |  | 0.9905 (0.9396 - 1.0413) |
|         | HMGCR  | Inverse variance weighted | 19   | <0.001 |  | 0.8237 (0.7638 - 0.8836) |
|         |        | Weighted median           | 19   | <0.001 |  | 0.8436 (0.7636 - 0.9236) |
|         |        | Weighted mode             | 19   | <0.001 |  | 0.8342 (0.7537 - 0.9147) |
|         | NPC1L1 | Inverse variance weighted | 6    | 0.0448 |  | 1.1595 (1.0150 - 1.3041) |
|         |        | Weighted median           | 6    | 0.1008 |  | 1.1587 (0.9828 - 1.3347) |
|         |        | Weighted mode             | 6    | 0.2435 |  | 1.1613 (0.9396 - 1.3831) |
|         | PCSK9  | Inverse variance weighted | 6    | 0.0448 |  | 1.1595 (1.0150 - 1.3041) |
|         |        | Weighted median           | 6    | 0.1008 |  | 1.1587 (0.9828 - 1.3347) |
|         |        | Weighted mode             | 6    | 0.2435 |  | 1.1613 (0.9396 - 1.3831) |
|         | APOB   | Inverse variance weighted | 32   | 0.1609 |  | 0.9781 (0.9471 - 1.0091) |
|         |        | Weighted median           | 32   | 0.3349 |  | 0.9793 (0.9368 - 1.0218) |
|         |        | Weighted mode             | 32   | 0.4154 |  | 0.9810 (0.9356 - 1.0265) |

0 1 2 3

**Supplementary figure 13.** MR analysis of association between drug targets and sex hormones (E2 and SHBG).

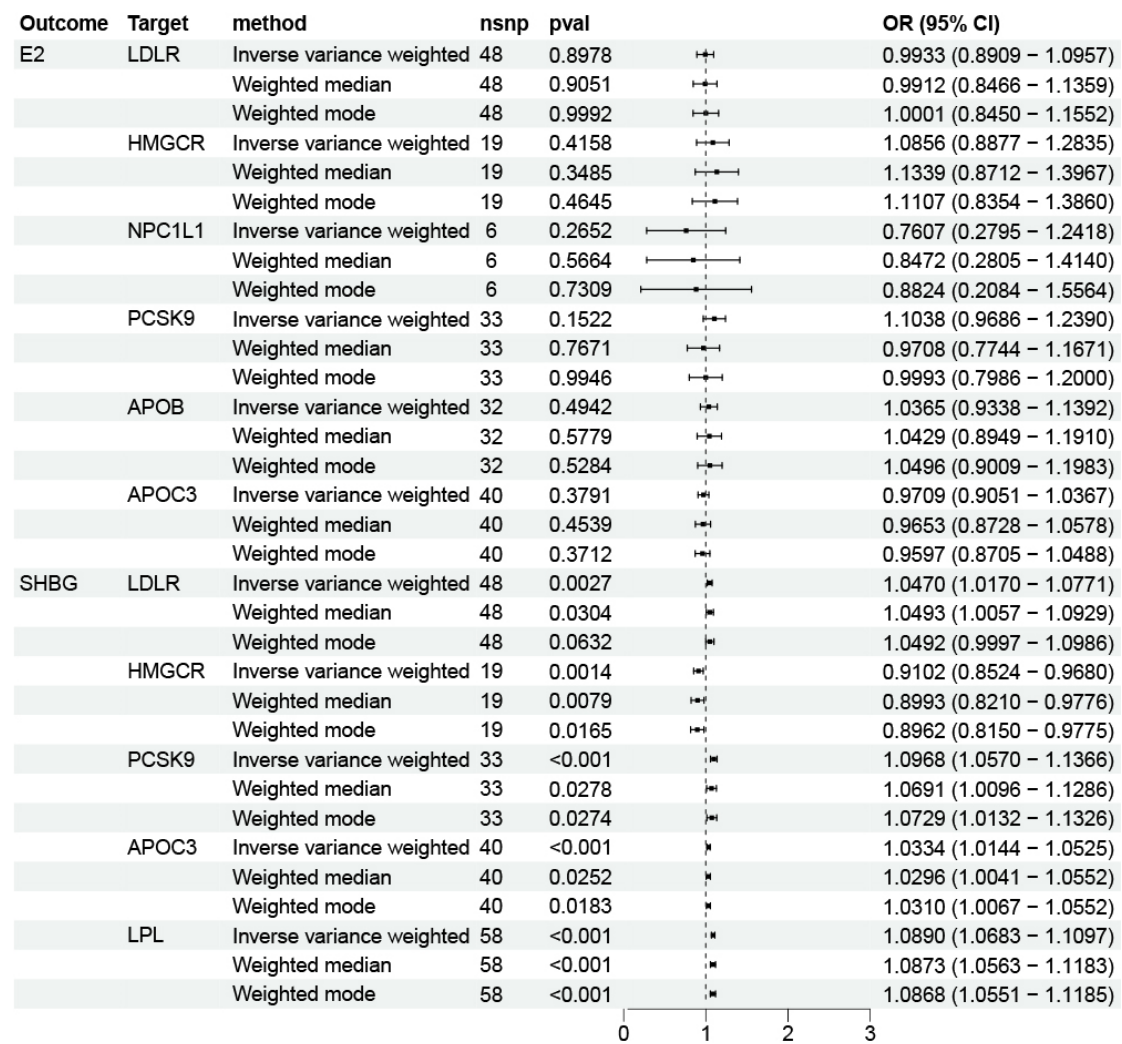

**Supplementary figure 14.** MR analysis of association between drug targets and male diseases (PH, PI and PCa).

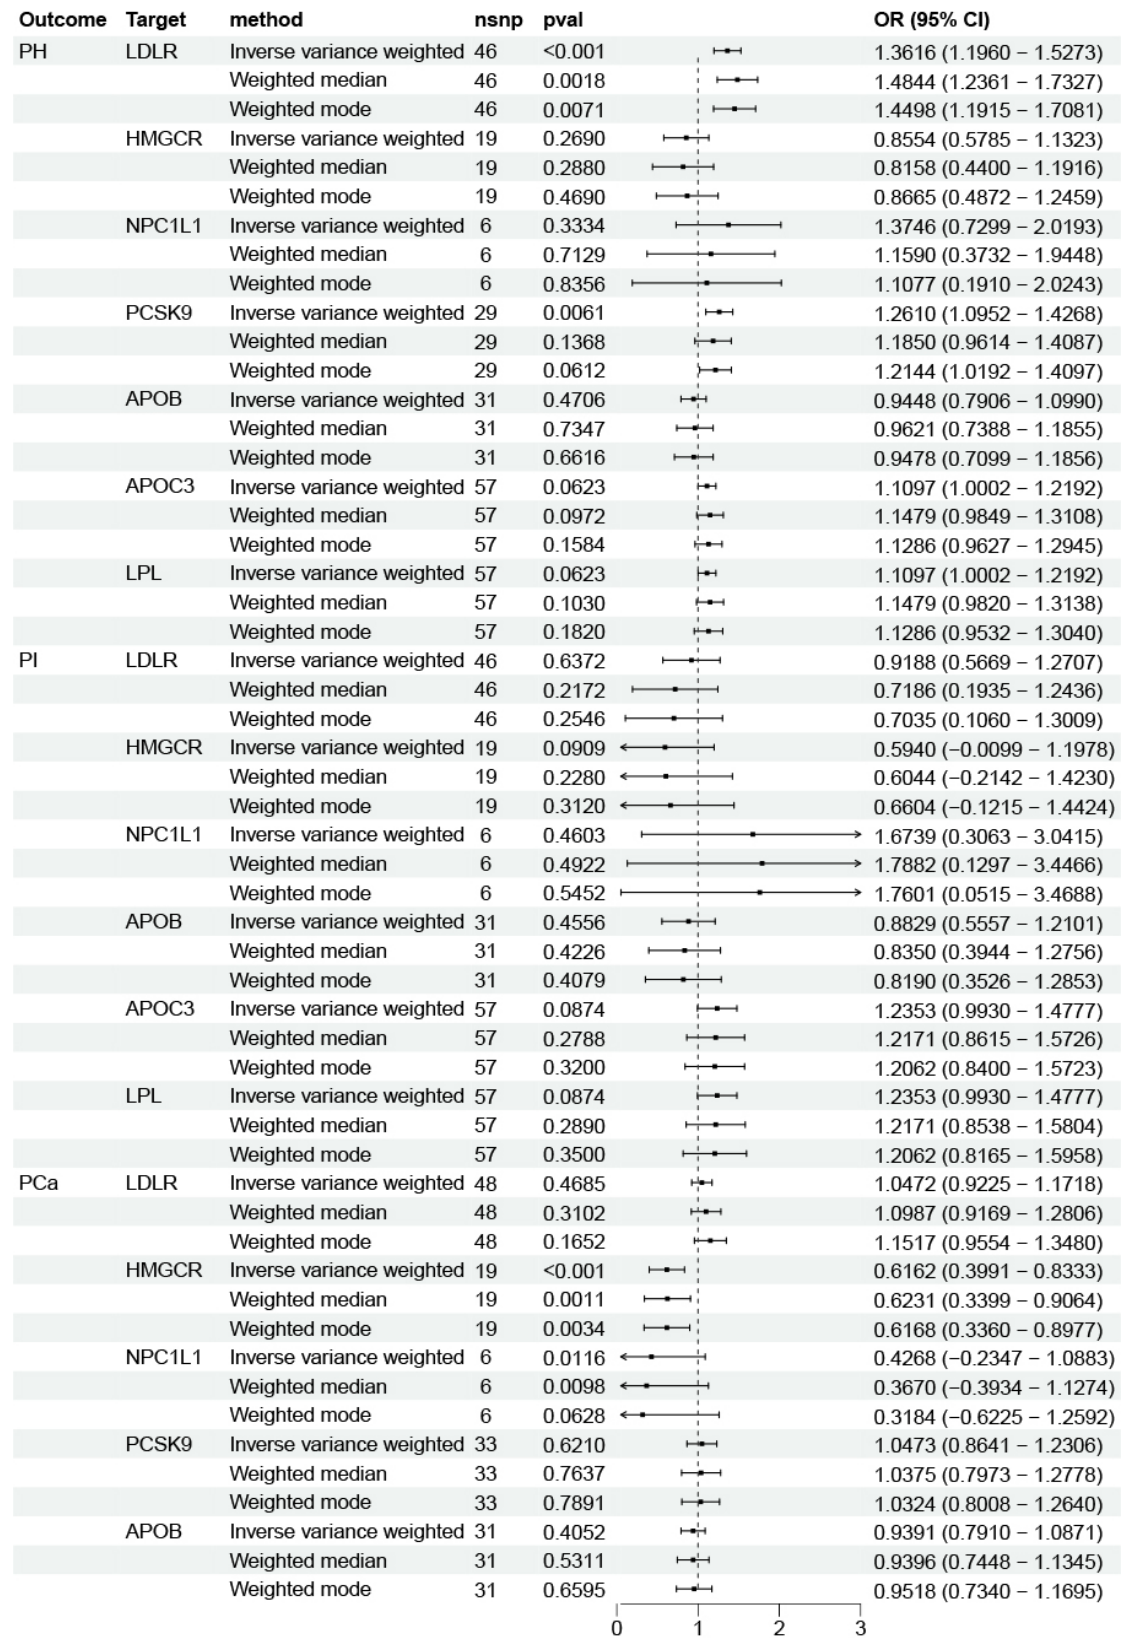



**Supplementary figure 15.** MR analysis of association between drug targets and male diseases (AS and MI).

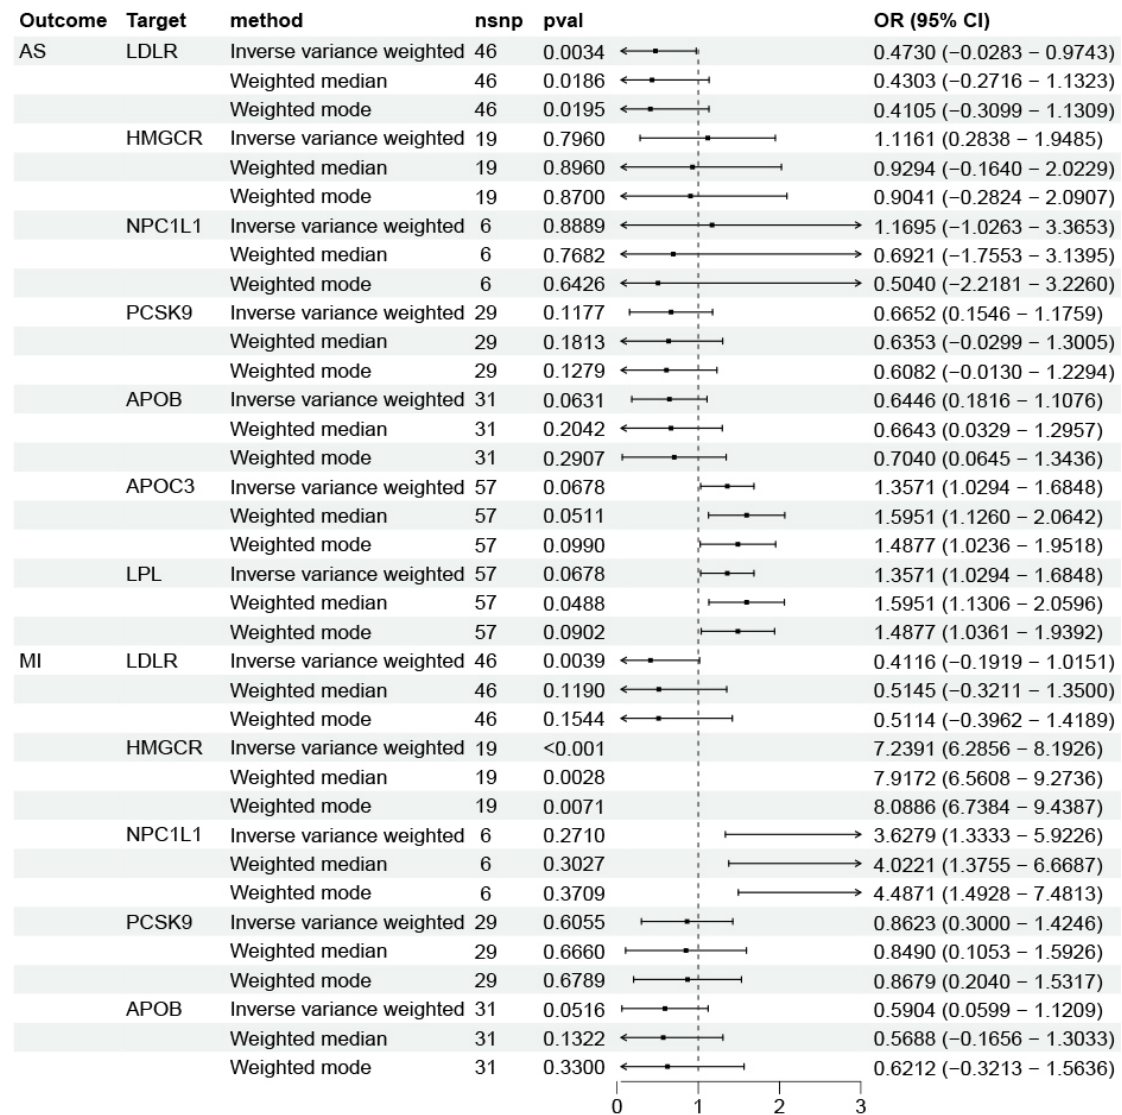

Supplement: Image_1.pdf [file Image_1.pdf]
